# Supplementary material for: The Relationship between Depressiveness and Eating Behaviors among Women
Source: MDPI journal article supplement (doi:10.3390/nu16020195), 2024-01-07
Supplement: s1 [file s1]

**Table S1.** General sociodemographic characteristics of the study group (N = 556).

| Sociodemographic variables |                                           | n   | %    |
|----------------------------|-------------------------------------------|-----|------|
| Education                  | Lower (secondary, vocational, elementary) | 287 | 51.6 |
|                            | Higher                                    | 269 | 48.4 |
| Marital status             | Single (maiden, divorced, widow)          | 186 | 34.5 |
|                            | in a formal/informal relationship         | 370 | 66.5 |
| Place of residence         | < 100.000 inhabitants                     | 293 | 52.7 |
|                            | ≥ 100.000 inhabitants                     | 263 | 47.3 |
| Professional activity      | Professionally active                     | 496 | 89.2 |
|                            | Professionally inactive                   | 60  | 10.8 |

n – number of cases, % – percentage of the total study group

**Table S2.** Descriptive characteristics of variables in the study group of women

| Variable                      | M     | SD   | Me   | Q1–Q3       | Min – Max   |
|-------------------------------|-------|------|------|-------------|-------------|
| Emotional Eating              | 3.85  | 1.55 | 4.0  | 3.0 – 5.0   | 0.0 – 9.0   |
| Uncontrolled Eating           | 5.59  | 2.71 | 5.5  | 4.0 – 7.0   | 0.0 – 15.0  |
| Cognitive Restraint of Eating | 6.21  | 2.89 | 6.0  | 4.0 – 8.0   | 0.0 – 15.0  |
| ORI                           | 37.45 | 5.40 | 38.0 | 35.0 – 41.0 | 15.0 – 55.0 |
| BDI (scoring)                 | 6.80  | 7.35 | 4.5  | 4.5 – 10.0  | 0.0 – 40.0  |

M – mean, SD – standard deviation, Me – median, Q1 – lower quartile, Q3 – upper quartile, Min – minimum, Max – maximum, ORI – Orthorexia Risk Index, BDI – Beck Depression Inventory

**Table S3.** Descriptive characteristics of depressive symptoms according to BDI I–II and the risk of orthorexia according to ORTO–15

| BDI I–II                       | n   | %    |
|--------------------------------|-----|------|
| no depression                  | 473 | 85.1 |
| minimal symptoms of depression | 43  | 7.7  |
| mild depression                | 29  | 5.2  |
| moderate depression            | 11  | 2.0  |
| ORTO–15                        |     |      |
| ORI                            | 344 | 61.9 |
| No risk of orthorexia          | 212 | 38.1 |

ORI – Orthorexia Risk Index, BDI – Beck Depression Inventory  
severity of depressiveness according to BDI on the orthorexia risk occurrence according to ORTO–15

**Table S4.** A univariate model – Analysis of the effect of sociodemographic variables

|               | ß     | –95% CI | +95% CI | t      | p       |
|---------------|-------|---------|---------|--------|---------|
| Absolute term |       |         |         | 37.692 | < 0.001 |
| BDI (scoring) | 0.007 | –0.077  | 0.090   | 0.159  | 0.874   |

ß – standardised regression coefficient, CI – confidence interval, BDI – Beck Depression Inventory

**Table S5.** Analysis of the effect of sociodemographic variables and the severity of depressiveness according to BDI on the orthorexia risk occurrence according to ORTO-15

|                            | $\beta$ | -95% CI | +95% CI | t      | p     |
|----------------------------|---------|---------|---------|--------|-------|
| Absolute term              |         |         |         | 0.016  | 0.988 |
| Marital status*BDI         | -0.001  | -0.168  | 0.166   | -0.012 | 0.991 |
| Age*BDI                    | 1.795   | -3.258  | 6.847   | 0.698  | 0.486 |
| Professional activity*BDI  | 0.133   | -0.073  | 0.338   | 1.269  | 0.205 |
| Educational background*BDI | -0.051  | -0.215  | 0.112   | -0.619 | 0.536 |
| Residence*BDI              | 0.061   | -0.096  | 0.217   | 0.762  | 0.446 |

$\beta$  – standardised regression coefficient, CI – confidence interval, BDI – Beck Depression Inventory  
\* moderation effect

**Table S6.** A multivariate model with moderation – Analysis of the effect of sociodemographic variables and the severity of depressiveness according to BDI on Uncontrolled Eating according to TFEQ-13

|                            | $\beta$ | -95% CI | +95% CI | t      | p     |
|----------------------------|---------|---------|---------|--------|-------|
| Absolute term              |         |         |         | 1.087  | 0.277 |
| Marital status*BDI         | 0.038   | -0.128  | 0.203   | 0.450  | 0.653 |
| Age*BDI                    | -1.339  | -6.363  | 3.685   | -0.524 | 0.601 |
| Professional activity*BDI  | -0.133  | -0.337  | 0.072   | -1.277 | 0.202 |
| Educational background*BDI | 0.040   | -0.122  | 0.203   | 0.489  | 0.625 |
| Residence*BDI              | 0.054   | -0.101  | 0.210   | 0.687  | 0.492 |

$\beta$  – standardised regression coefficient, CI – confidence interval, BDI – Beck Depression Inventory  
\* moderation effect

**Table S7.** A univariate model – Analysis of the effect of sociodemographic variables and the severity of depressiveness according to BDI on Emotional Eating according to TFEQ-13

|               | $\beta$ | -95% CI | +95% CI | t      | p      |
|---------------|---------|---------|---------|--------|--------|
| Absolute term |         |         |         | 32.272 | <0.001 |
| BDI (scoring) | 0.073   | -0.011  | 0.156   | 1.714  | 0.087  |

$\beta$  – standardised regression coefficient, CI – confidence interval, BDI – Beck Depression Inventory

**Table S8.** A multivariate model without moderation – Analysis of the effect of sociodemographic variables and the severity of depressiveness according to BDI on Emotional Eating according to TFEQ-13

|                        |                                     | Level  | $\beta$ | -95%<br>CI | +95% CI | t     | p     |
|------------------------|-------------------------------------|--------|---------|------------|---------|-------|-------|
| Absolute term          |                                     |        |         |            |         | 2.317 | 0.021 |
| Educational background | Primary+Vocational+Secondary (ref.) |        |         |            |         |       |       |
|                        | Tertiary                            | 0.019  | -0.068  | 0.106      | 0.428   | 0.669 |       |
| Residence              | < 100,000 (ref.)                    |        |         |            |         |       |       |
|                        | ≥ 100,000                           | -0.033 | -0.117  | 0.052      | -0.752  | 0.452 |       |
| Marital status         | single (ref.)                       |        |         |            |         |       |       |
|                        | in a relationship                   | 0.051  | -0.037  | 0.140      | 1.141   | 0.255 |       |

|                       | Level           | $\beta$ | -95%<br>CI | +95% CI | t      | p     |
|-----------------------|-----------------|---------|------------|---------|--------|-------|
| Professional activity | inactive (ref.) |         |            |         |        |       |
|                       | active          | 0.009   | -0.083     | 0.101   | 0.197  | 0.844 |
| Age                   |                 | -0.067  | -0.163     | 0.030   | -1.361 | 0.174 |
| BDI (scoring)         |                 | 0.078   | -0.006     | 0.161   | 1.821  | 0.069 |

$\beta$  – standardised regression coefficient, CI – confidence interval, BDI – Beck Depression Inventory

**Table S9.** A multivariate model with moderation – Analysis of the effect of sociodemographic variables and the severity of depressiveness according to BDI on Emotional Eating according to TFEQ-13

|                            | $\beta$ | -95%<br>CI | +95% CI | t      | p     |
|----------------------------|---------|------------|---------|--------|-------|
| Absolute term              |         |            |         | 1.097  | 0.273 |
| Marital status*BDI         | -0.139  | -0.305     | 0.027   | -1.644 | 0.101 |
| Age*BDI                    | -0.822  | -5.867     | 4.223   | -0.320 | 0.749 |
| Professional activity*BDI  | -0.177  | -0.382     | 0.029   | -1.690 | 0.092 |
| Educational background*BDI | 0.127   | -0.036     | 0.290   | 1.531  | 0.126 |
| Residence*BDI              | -0.035  | -0.191     | 0.121   | -0.443 | 0.658 |

$\beta$  – standardised regression coefficient, CI – confidence interval, BDI – Beck Depression Inventory

\* moderation effect
